# Supplementary material for: Improving Met Office seasonal forecasts of Arctic sea ice using assimilation of CryoSat-2 thickness
Source: Copernicus journal article supplement (doi:10.5194/tc-2018-62), 2018-04-18
Supplement: Supplementary file [file tc-2018-62-AC2-supplement.pdf]

## Response to review #1

We thank the referee for their review of our manuscript. Answers to the specific comments in the review are listed inline below. The review comments are in black italics and our response is in red.

While we have taken the reviewers comments seriously, it is clear that many of the comments stem from a misinterpretation of the goal of this paper. Our goal here is to show the impact, on coupled seasonal predictions, of including CPOM CS2 sea ice thickness observations within the initialisation of the GloSea coupled model. Whilst the production of a sea ice analyses, for use as initial conditions, was therefore crucial to this stated goal, it was not, unlike for Allard et al. (2018), the primary purpose of this manuscript.

Having shown the usefulness of the sea ice thickness initialisation on the seasonal forecast system, we have laid the groundwork and motivation for a proper data assimilation treatment to use sea ice thickness observations in an ocean and sea ice analysis. That work would require the sort of data comparison with which many of the reviewer's comments are concerned. However, an in-depth evaluation of the thickness analyses, and comparison, of several sea ice thickness observational estimates, is outside the scope of the current manuscript.

We shall make these points clearer in the revised manuscript to ensure that the motivation for this study is clear.

*A general gripe of this study and similar ones: I find it really challenging to understand what you mean by the use of forecast and hindcast throughout the paper and they seem to be used interchangeably. If you are using prescribed atmospheric forcings that have assimilated real data then my view is anything using that is a hindcast not a forecast. Prediction is the more general term that could be appropriate but I see nothing in this paper that resembles a true forecast (no future knowledge), despite the title.*

We would disagree about the definition of 'hindcast' here. A hindcast is simply a retrospective forecast - performed under the same conditions as a true forecast but done when the result is already known. For example, when we perform hindcasts to test the forecast skill of the FOAM ocean-ice only forecasting system (Blockley et al., 2014), this is done using atmospheric forcing that has not assimilated data. However, this distinction is not relevant here because we do not use any atmospheric forcing for the coupled atmosphere-ocean-sea ice-land seasonal hindcasts performed within this study. What is important here, is that a hindcast is used to test the expected skill of a real forecast – and must be done in a fashion that does not use **any further** prior observational data after initialisation so as to invalidate that expectation.

As well as defining whether the prediction is made for a known past state (hindcast) or an unknown future state (forecast), the terms hindcast and forecast are also used within the GloSea seasonal prediction system (see MacLachlan et al. 2014) as a technical distinction. GloSea forecasts are carried out each day (2 members per day for the 210-day forecasts), whereas hindcasts – used for testing purposes and for the bias correction – are carried out for only 4 start dates per month but with more (8) ensemble members. This technical distinction has not been explained in this manuscript (although it is in the cited material) because it is not relevant to understanding our results.

We acknowledge that the terms 'forecast' and 'hindcast' have been used somewhat interchangeably in this manuscript, and that this may cause confusion. The reason for this is

that 'forecast' is much more easily understandable than 'hindcast' or 'retrospective forecast' - even though technically all coupled predictions in this work are the latter.

To make the forecast/hindcast distinction clearer we shall change our terminology to use 'predictions' throughout this study (including in the title). However, the use of 'forecast' as an adjective (e.g. forecast skill) will remain. We hope this will help to make the distinction that these are unforced free-running seasonal coupled predictions.

### **Main comments**

*It's really not clear from the motivation what it is you are trying to achieve by assimilating sea ice thickness in this study. In some cases you say the ice area/extent impact is negligible (as you ignore lower thickness ice) but other times it seems you highlight big improvements in your ice edge 'forecast'. You should really present a hypothesis you are testing in this kind of study (i.e. which metrics you are assessing). In general I would think assimilating thin ice should be especially important for seasonal (spring/summer) forecasting as you want to correctly incorporate this into your model as this is the ice most likely to melt out. If you get that wrong, you get the summer melt wrong. It seems like you used the opposite reasoning to justify not using the AWI/SMOS data but your results suggest the opposite to be true if you care about both the summer ice thickness and ice edge.*

We find it hard to follow the reviewer's line of argument here. We had hoped that the motivation for the study would be clear from the manuscript title: We show improvements in seasonal predictions of Arctic sea ice that arise from incorporating observations of sea ice thickness in the initialisation of these predictions. One of the more relevant predictions of ice cover is the ice extent, and ice edge location, at the end of the season (summer) – which is very much centre point in this manuscript – and shows significant improvement. Motivation for using these methods of success are that these quantities are easily assessed using current satellite concentration data, and that September-mean extent is the primary focus of the SIPN Sea Ice Outlook (although regional forecasts are also now gaining a focus).

As suggested, we shall add a hypothesis statement at the end of Section 1 to make our motivation for this study clearer and will review the abstract in this regard.

*I had a lot of issues with Section 2.2 (describing the CryoSat-2 data):*

*- You need to make clearer the various thickness datasets available and how a number of groups are now routinely producing sea ice thickness estimates, e.g. NASA/AWI/CPOM for CryoSat-2. - CPOM and NASA data were used in the study of Allard 2018. You need to make this clearer. It was in general unclear how your study differed from Allard and I think you need more discussion of their approach and results.*

Allard et al, (2018), further backed up by Stroeve et al, (2018), show the differences between the various datasets are not particularly major. Differences in the CS2 products arising from the retracking and processing algorithm differences are very small in comparison to the differences that nudging to CPOM CS2 data has on our sea ice thickness initial conditions. We shall add wording to this effect in our revised manuscript.

As our focus here is on the large-scale impact of initialising thick Arctic sea ice from CS2 within a fully coupled seasonal prediction system (GloSea). This is very different from the work of Allard et al. whose focus is on a reanalysis of sea ice thickness made using a forced ocean-

sea ice model. An in-depth evaluation and comparison of sea ice thickness observational estimates, is outside the scope of our manuscript but is comprehensively addressed in Rick's. Having no desire to repeat the work already done in the Allard et al. (& now Stroeve et al.) studies, we have **chosen** here to test/show the impact of assimilating CPOM CS2 data in a seasonal prediction system.

The results of this study motivate us, and presumably others, to assimilate SIT properly within our operational sea ice analysis and seasonal prediction systems by making changes to the data assimilation system. During this next stage of the development process, we will absolutely care about things like observational error characteristics, the impact of choices made in the processing algorithms, and other details of the observation processing. This work is being addressed as part of our contribution to the H2020 SEDNA project. However, at this stage, for this feasibility study, we feel it is not relevant.

A statement of our proposed motivation and/or hypothesis will be added at the end of Section 1 to make these points clearer. We shall also include a sentence to state that these aspects were dealt with by Allard et al. (and add Stroeve et al.) and will also highlight how our work here differs from the study of Allard et al. (2018).

*- Is the pole hole and the data uncertainty really why these data haven't been used? It seems like any reasonable assimilation scheme shouldn't need complete coverage and can factor in data uncertainties. My guess is that the main reason was data availability, the fact these thickness products were in their infancy, and inertia.*

Yes data availability is also important but so is the pole-hole. Prior to CS2 the pole hole was very large. For ERS 1&2 it essentially covered all the central Arctic basin. A large pole-hole is not a big problem for the SIC assimilation because, historically at least, the ice is, fairly uniformly, close to 100% concentration near the North Pole. However for SIT, the situation is not so simple because thickness gradients across this region are quite large, meaning that any DA scheme attempting to spread the information would be heavily reliant on models to get this right. Coupled with the observational uncertainty issues this makes for a daunting problem.

However, we agree that availability is likely the most important factor here so we shall switch the order of the 3-fold reasons to put data availability first.

*- On that note, how do you treat the fact you are unlikely to have complete coverage from the CryoSat-2 data?*

We only modify the thickness fields where we have data and no attempt is made to spread observational data. This is fine for our feasibility study with monthly binned data, but when we move on to assimilating the raw altimeter tracks in a full variational scheme, much more work will be required to specify observational and model errors, covariances, etc.

More information about what is required for a full operational implementation of SIT assimilation will be added to the revised manuscript – briefly in the motivation and then again in the 'further work' section.

*- After listing problems associated with generic thickness data you then say this is improved by the availability of CS-2 thickness data. This doesn't make much sense as it is written.*

The availability of CS2 data does reduce the magnitude in all 3 of the problem areas we highlight (timeliness, pole-hole, accuracy). Most apparent is the reduction in pole-hole diameter with CS2 owing to the orbit inclination. However, the accuracy is also improved owing to the higher along-track accuracy/resolution of the SIRAL altimeter (compared with ENVISAT & ERS-1/2). (See for example Guerreiro et al., (2017) who use CryoSat-2 to correct biases in Envisat freeboard estimates). Finally, as the SIT methods have become more mature, their processing has become quicker and more operationally robust. We now have access to CS2 SIT from CPOM in near-real-time which make SIT a viable option for incorporation into our operational prediction systems.

This is partially explained in the following sentences but we shall modify this text to explain these points more clearly and add the Guerreiro et al., (2017) reference.

*- You should cite the relevant studies regarding uncertainty estimates, not just the Ricker/AWI reference and apply that to CS-2 data derived by other groups. There are strong differences in the retracking procedures which may have impacts on respective data uncertainties across the products.*

As we have previously stated, we are not concerned about the differences between these observational products in this study. Instead our motivation is the impact of SIT initialisation on seasonal predictions of Arctic sea ice cover (i.e., extent and ice-edge location). We use the – really quite comprehensive – studies of Ricker et al. here purely to provide approximate bounds below which the CS2 is likely to be of no value. However when we come to do this as a data assimilation problem – rather than a seasonal coupled prediction problem – we will be very interested in the observational uncertainty/properties.

*- I don't get what this extra quality checking of the CPOM CS-2 data is. The fact you have included a personal comms from one of the data producers of that dataset makes it seem like this is something they do too? What exactly do you mean by smearing?*

This is related to the regridding and binning of the data performed by CPOM to ensure that high spatial gradients are not smeared out. This was actually recommended by CPOM and so should be considered part of their observational processing.

With this in mind, we now feel that the inclusion of this sentence is actually distracting to the reader – especially given that observational uncertainty is not our primary concern in this study. We therefore propose to remove this sentence from the revised manuscript.

*Why not use daily along-track CryoSat-2 data? I thought this was the whole purpose of CPOM releasing the daily along-track data? Instead they grid the data, then you grid the data, then you interpolate to get a daily thickness?*

Yes, you are correct. Assimilating altimeter tracks of thickness (or more likely the raw freeboard) is the ultimate goal for SIT assimilation in our systems. However much work is required to do this. Observational errors need to be quantified (including representativeness), and model/observation covariances and correlations are required to spread the data from the tracks. Finally, balancing with ice concentration and other aspects of the model (SST, SSS) are required. Doing all this is a considerable undertaking and so, before doing this, we wanted

to be sure that the SIT initialisation would have an impact on the model – hence this feasibility study using gridded data.

We shall make this point clearer in the introductory motivation – namely the hypothesis statement at the end of Section 1. More information about what is required for a full operational implementation of SIT assimilation will also be added to the ‘further work’ section of the revised manuscript.

*Hard to tell what this volume comparison really means. You compare with PIOMAS but then say that data is biased low (which I’m not actually sure is true when you look at more than one CS-2 estimate) so it is actually good that you are further from that data? You say this was expected but this seems like a hindsight statement to me. I agree PIOMAS data can provide useful context but I don’t agree with how you’ve used it. I think you should just show the CS-2 data and say look, the assimilation does what it is supposed to do.*

Yes, it was expected that the winter sea ice volume would be higher than PIOMAS. This was an obvious and logical expectation given that the CPOM CS2 data we are assimilating has higher volume than PIOMAS (as documented by the Laxon et al. and Tilling et al. CPOM studies). However, the key point here is that this doesn’t actually matter. We only include PIOMAS comparison in our evaluation as a reference because it is well understood and widely used for this purpose. We do not use it for verification. We shall make this clearer in the revised manuscript.

Furthermore, we shall take your final piece of advice to illustrate the impact of the assimilation by showing that the CS2 analysis matches the CS2 data. This will be done by extending Figure 2 to include the CS2 observations and the model fields (rather than just the differences).

*P10 L10-20 and elsewhere: Very confusing to me if these are hindcasts or genuine forecasts. You use both labels interchangeably. How could you move forward to produce genuine forecasts?*

As stated earlier, these are hindcast or retrospective forecasts that are identical to genuine forecasts in everything except the fact that they are performed in the past (i.e., with the result already known). A ‘hindcast’ is a prediction made for a known past state whereas a ‘forecast’ is made now for an unknown future state. All other aspects of the prediction are essentially identical. To produce genuine forecasts we would just need initial conditions for now and then wait 4 months to see how well they did.

We shall modify the manuscript to say ‘prediction’ instead of either forecast or hindcast, which were used somewhat interchangeably.

### **Specific comments**

*In the abstract: really the ‘first time, we directly assess the impact of winter sea ice thickness initialisation on the skill of seasonal summer forecasts’? Do you mean in the Met Office model framework? I think Allard and others have done this and I also don’t think you do assess forecast skill*

Yes, this is the first documented study to assess the impact of using satellite sea ice thickness data to initialise a fully coupled seasonal prediction system. This fact is confirmed by the

comments of referee #2 who states, “This study represents the first known fully coupled atmosphere-ocean-ice forecast system to utilize CryoSat-2 ice thickness data for seasonal forecasts”.

The study of Allard et al (2018) is very different because they use a forced ocean-sea ice model to perform long ocean/sea ice analyses. They also perform a thorough assessment of the thickness analyses produced and consider short-range, uncoupled, forecasts. Here we are only interested in the analysis in the context of providing sea ice initial conditions for our seasonal predictions – made using the GloSea seasonal prediction system.

We are a little confused about the referee’s comment “I also don’t think you do assess forecast skill”. Here we run 24 retrospective seasonal forecasts per year, for each of 5 years (120 in total), to produce seasonal predictions of September Arctic sea ice using initial conditions in April/May. These predictions are performed under forecast conditions using an initialised coupled climate model in the same way as we do operationally in the GloSea Seasonal Prediction System. We then evaluate the quality of September-mean Arctic sea ice predictions by comparing basin-wide extent against observational estimates (from NSIDC, HadISST & OSI-SAF – the latter using the CMEMS reanalysis), and by calculating integrated ice edge error (IIEE) against the latter dataset. This is the standard methodology for examining skill in a seasonal forecast system, where the accumulation of sufficient evidence from “real time” forecasts would require substantial delays to the provision of information required to update forecast systems within a realistic period.

*Introduction - In general you need more updated references. A lot of this discussion is a bit outdated now. i.e.:*

*- Drop the Vaughan/IPCC refs and use the more specific refs. Try Serezze & Stroeve 2015 for a more recent seasonal sea ice trends citation?*

*- The Collins/IPCC is also a bit outdated. I think you can add some of the more recent references to sea ice projections - e.g. Jahn 2016, 2018.*

We believe the most appropriate citations are those given. The intention here is to motivate the fact that Arctic sea ice has declined/is in decline and that is projected to continue.

The most robust evidence of this is provided by these multi-author IPCC references, which are created by a multi-disciplinary (multi-centre, multi-country, etc.) team of authors. (This is also true for the very comprehensive, multi-author study of Meier et al. (2014).)

*P2 L1-11 - I think this is not useful information as it is not that relevant to seasonal forecasting and a lot of the references and discussion are outdated. Either update/improve or drop.*

We disagree and think this is extremely relevant material. Substantial resources are being invested in seasonal planning in the Arctic (e.g. within the EU’s Horizon 2020 programme, the ARCUS Sea Ice for Walrus Outlook (SIWO), in support of projects endorsed by the WMO’s Year Of Polar Prediction (YOPP) & MOSAiC), with more such investment by both government and private organisations is likely in the future. In particular, there are a number of projects endorsed by YOPP which focus on sea ice seasonal prediction (you can see an overview of YOPP-endorsed projects at <https://apps3.awi.de/YPP/endorsed/projects>, noting in particular: <https://apps3.awi.de/YPP/pdf/stream/79>, <https://apps3.awi.de/YPP/pdf/stream/100>, <https://apps3.awi.de/YPP/pdf/stream/106>, and <https://apps3.awi.de/YPP/pdf/stream/172>).



We do not believe that, as a general rule, citations should have a “best before date”. So if no further information has been published in the meantime to contradict the findings of these papers, which clearly have had a large impact on the funding agencies, then they are entirely appropriate.

*P2 L13 - change sentence ordering.*

OK. We shall change this to: “Interest in seasonal predictions has increased following the drastic reduction in Arctic sea ice extent in the summer of 2007, which led to a (then) record-low summer minimum extent being set.”

*P2 L17 - the predictive skill sentence is confusing. SIPN haven't really assessed that.*

Yes it is true that SPIN, the US project, has not done this itself. However, our point here is that the existence of SIPN has caused this as a secondary effect. The community that has been built up around SIPN has fostered collaborative studies in this area, which have been supported by the forecast data provided to SIO (and the models used to produce them). We shall reword this to make the distinction clearer.

*P2 L19-23 - I don't think you've really said why it is interesting though! Either make a clearer point regarding its scientific interest (e.g. what the predictability/memory of the system is compared to other components of the climate system).*

Well it interests us and, given the number of papers published on the subject, we suspect many others too. We shall reword this sentence to emphasise the fact that prediction beyond medium-range timescales is challenging.

*Also I don't think it is clear that sea ice is now necessarily harder to predict. Having some enhanced variability may be useful. Your figure 4 doesn't show an increase in ice edge error for instance!*

In fact Figure 4 does have an increasing trend! The IIEE in the control predictions (Fig 4b) is increasing over the period 1992-2015 with a small slope of approx. 0.0087 million square km per year (or 8700 square km per year). Although this is small relative to the long-term mean, it is statistically significant (p-value < 0.016). We include a modified version of Fig 4b below with the trend line overlain in red (see Figure 1 below). Of course, this in itself does not prove that forecasting is more challenging with less/thinner/more variable sea ice – and we are not arguing here that it does. However thinner sea ice will be more heavily influenced by the non-linear, chaotic atmospheric circulation (both dynamically and thermodynamically), which would undoubtedly be less predictable.

That prediction of sea ice becomes harder as the ice thins is one of the results of Holland et al (2010) who show that “ice area in a thicker sea ice regime generally exhibits higher potential predictability for a longer period of time”. Furthermore Stroeve et al (2014) also support this stating: “The reduced predictive skill as the winter ice cover thins has been noted in some of the contributions to the SIO and appears to be coincident with the rapid thinning of the ice cover.”

We shall add additional citations to Holland et al. (2010) and Stroeve et al. (2014) at the end of this sentence.

*P2 L27 - why exactly does a lack of observations make the forecasts harder? Less to assimilate in models or to validate? Below you list a number of observations that are available in the poles...*

We did not mean to imply that the forecast models were hampered by the lack of observations, but that it is the initialisation of forecasts that are hampered by the lack of observations. We shall change this wording to: "In particular, initialisation of forecasts in the Arctic are less accurate owing to observations being less abundant, and assimilation techniques less advanced in polar regions, hampering the forecasts in these regions as compared to forecasts at lower latitudes."

*P2 L35 - include acronym definitions.*

Yes, this is the first usage of the acronym FOAM = "Forecast Ocean Assimilation Model" in the paper. This definition shall be moved forward from later in the paper (p. 4, l33).

*P3 L4 onwards - this is a bit of a confusing paragraph to me. What is the point you are trying to make? In general my view is that there is hope for dynamical models being used for skillful sea ice forecasting based on some of the perfect model studies that you cited. However the SIO has really shown that they are not currently performing much better than the linear trend in many cases (as shown by Stroeve et al., 2014).*

Yes this is pretty much the point we are trying to make. We shall reword the motivation in Section 1 to make this clearer.

*It still seems that dynamical models are lagging behind more simple statistical methods (e.g. Schroeder et al., 2014, Petty et al., 2017)*

Yes this may be true. The studies of Stroeve et al. (2014) and Hamilton and Stroeve (2016) suggest that predictions from both statistical and dynamical models beat heuristic predictions (guesses) and that this is statistically significant. They further suggest that statistical models are slightly better than dynamic but not with any degree of significance. One could therefore conclude that it seems fairly simple to create a statistical model that can predict Arctic sea ice extent to a similar degree as dynamic models. However, although statistical models are interesting (and promising), they do not replace the need for the full dynamical models which provide a much wider offering. For example creating a statistical model that would predict the ice edge 5 months in the future, with anything like the degree of accuracy seen in the predictions we make here, would be a very challenging endeavour.

*I think you need to add in some comments on the different forecast methods available, merge with the following paragraph about improving dynamical models and make clearer what the motivation of this study is! This should be the key paragraph of the introduction.*

*P3 l 24 - not sure how this point links to the above.*



We shall modify the introductory motivation in Section 1 to make this (and the 2 previous point) clearer and to better motivate the interest in seasonal predictions using dynamical models.

*P4 L1-4 - but in the abstract you imply you are the first to do this?! I guess you meant in your fully coupled Met Office forecast framework. You need to make that clearer.*

Yes we are. As stated previously this is the first use of satellite thickness data to initialise seasonal coupled predictions of Arctic sea ice. The previous studies listed here are using forced ocean-sea ice models and performing reanalyses and/or short-range forecasts.

In contrast we are performing seasonal predictions (5-month forecasts) using a fully coupled atmosphere-ocean-sea ice-land model with the GloSea seasonal prediction system.

*P5 L11-13 - why just mention the ocean reanalysis component here? Would be more understandable if you referred to GloSea as a reanalysis.*

No! GloSea is a coupled seasonal prediction system (see MacLachlan et al (2014)). Referring to it as a reanalysis would be more misleading.

The motivation in this section of the manuscript is to introduce the fact that long reanalyses are performed using an offline analogue of the FOAM ocean analysis system. These long reanalyses are used within the GloSea seasonal prediction system to initialise hindcast (or re-forecast) experiments. They are also used for furthering understanding of the ocean and how the ocean has changed over the satellite period (e.g. within ORA-IP). As the ocean reanalysis is used within the GloSea seasonal prediction system, it is sometimes (erroneously/unfortunately) referred to as the GloSea ocean re-analysis. However, GloSea is a coupled global seasonal prediction system (see MacLachlan et al., 2014).

We shall reword these parts of Section 2 to make this clearer to the reader.

*P5 L23 - I don't think these are the correct citations here. Link to relevant passive microwave concentration datasets instead or recent papers describing that long-term record (e.g. Parkinson/Comiso papers).*

The motivation behind these citations is two-fold: 1) to provide references for the HadISST and NSIDC data sources that we use within our forecast evaluation; 2) to show that we have long-term sea ice concentration observations from multiple sources. The citations given here are those recommended/requested by the data providers for the NSIDC sea ice index (<https://nsidc.org/data/g02135>) and for the HadISST dataset (<https://www.metoffice.gov.uk/hadobs/hadisst/>). Therefore, their inclusion is required for our objective #1 and we re-use them for our objective #2 to avoid including lots of similar citations.

*P5 L25 - should reference Kwok and Cunningham 2008 instead.*

We shall change this from the 2009 reference to the Kwok and Cunningham (2008) reference.

*P6 L16-17 - what do you mean by sensitive here? I think you mean uncertain/challenging? Again, is there nothing in one of the CPOM papers that highlights this issue?*

Yes we mean uncertain. Sensitive will be replaced with uncertain in the revised manuscript.

When freeboard is very low it is difficult to distinguish from SSH fluctuations and gravity waves. This issue is well documented in the comprehensive Ricker et al. citations that we have used. Given that the issue is related to the whole process of deriving freeboard from satellite altimetry – in particular CS2 SIRAL radar altimeter which penetrates the snow and into the upper layer of the ice – rather than the centre who happen to be processing the data, we are happy that these citations cover the issue adequately.

*P6 L30 - I think this is a big guess. Do we really know much ice < 2 m melts away each summer? That Keen modeling study (Fig 2?) suggests some 40% of the ice less than 2 m (including ice and snow in that thickness) does not melt through in summer. A lot will have to do with how much snow there was on the ice and where/when melt onset occurs. Even if it does melt away, this seems to be crucial information for determining solar absorption that can drive SST increases and further sea ice melt.*

This paragraph has been removed in revision. The hypothesis/motivation statement at the end of Section 1 will tell the reader that our interest is the impact of thick ice initialisation on seasonal prediction skill. To avoid any confusion with thin ice we shall no longer refer to SMOS in this section.

Instead, we shall start subsection 2.2.1 with some additional motivation for our thick ice initialisation along the lines of: “For accurate seasonal predictions of September sea ice cover it is important to model ice that will persist throughout the summer season. Meaning that an improved representation of the location of thick sea ice within the initialisation of our system should be advantageous. In this study we shall initialise our model using thick ice from CS2, which are accurate for ice thicker than 1m (Ricker et al., 2017). We shall use monthly CS2 winter (Oct-Apr) thickness estimates produced by CPOM (Tilling et al., 2016) which start from October 2010 until present (at time of writing)....”

*Also need to make the point here (and earlier) that AWI do produce a merged product!*

We find this statement hard to reconcile with the referee's earlier comments on using a gridded ice thickness product as opposed to the along track product.

However we shall again emphasise here that we are using the CPOM CS2 product as a test bed to investigate the effect that initialisation of sea ice thickness will have on a coupled seasonal forecast. We are not performing a summary, or comparison, of the available thickness data products.

Our results here motivate the desire to implement sea ice thickness observations properly within our 3D-Var assimilation framework. As part of this extension, we will be combining observations of sea ice thickness derived from both altimeter (CS2) and radiometer brightness temperature (SMOS) measurements, in a synergistic fashion, within the data assimilation system.

Because this is a blended product (created using an optimal interpolation assimilation technique), it is not something that we would normally assimilate in the system. We do however use gridded analyses like this for the purposes of model evaluation and will likely use this CS2SMOS data in the next stages of this work.

*Section 2.3 - Why do you need extent and concentration? Surely you are just assimilating sea ice concentration? This needs to be made much clearer here.*

*There appears to be some confusion by the reviewer that this section is referring only to data used for assimilation. Section 2 is about all the models and datasets used in this study – both for assimilation and for evaluation. Although Section 2.3 covers the validation datasets in paragraph 1 and the assimilation data in paragraph 2, we acknowledge that it is not very well explained.*

*Therefore we shall alleviate this confusion in the revised manuscript by explicitly stating this in the preamble to Section 2.3. We shall further modify paragraphs #1 and #2 to state that data is used for validation and assimilation respectively.*

*- The use of CMEMS 'data' seems very confusing to me. Why not use observed ice concentration?!*

It is very common to use an analysis product for evaluation purposes. For example, many people use the OSTIA analysis for evaluating SST or ERA-Interim for evaluating atmospheric variables. Likewise, people are now starting to use the blended CS2SMOS product (Ricker et al. 2017) to evaluate sea ice thickness (which itself is an SIT analysis created using O/I assimilation methods). Although we would never assimilate analysis products like these, we do use them for the purpose of model evaluation.

In this study we validate using the ice concentration from the CMEMS reanalysis, which is an analysis made using the OSI-SAF sea ice concentration data. The main reason for using this is that it is already on the correct model grid. We state that: "Using this CMEMS reanalysis has the benefit that it is performed on the same ORCA025 grid as the ocean-sea ice components of the GloSea seasonal forecasting system, which makes spatial comparisons easier."

It is important to note that, except for the differences due to the spatial resolution, the sea ice concentrations in the OSI-SAF observed data and the CMEMS analysis are virtually identical. The CMEMS product can therefore be thought of as a dynamically consistent re-gridding. It is of course very important to compare extent using products on the same grid because extent, as a metric, is very much dependent on grid/resolution (Notz, 2014).

*- The NSIDC sea ice index is just a monthly index of total ice extent. This isn't what you use, right?*

Yes we use the NSIDC single number extent for the purposes of validating our September-mean ice extent predictions (in Fig 4). However we also use extent derived from HadISST sea ice concentration, and from the CMEMS reanalysis (i.e., OSI-SAF).

*P8 L6 - what is the size of your model grid (in kilometers?) how does this translate to the 5 km CPOM data?*

The ORCA025 tripolar grid was created to avoid the singularity associated with the convergence of meridians at the North Pole, which it achieves by defining two distinct north

poles over Canada & Siberia. The ocean points in between form a variable resolution grid with highest resolution nearest the two poles i.e., in the Canadian Arctic Archipelago and the Laptev Sea. The resolution in the Arctic Ocean ranges from ~9km up to ~15km.

*P8 L14-24 - Think you should list out the CICE thickness categories. How else could you have done this? I think it would be worth presenting more sophisticated approaches for future work, however I get that you started with this simple approach.*

We use standard WMO categories that are one of default options within the CICE model. These are listed in the supporting Blockley et al., (2014), and Ridley et al. (2018) references.

In the revised manuscript we shall include this information in Section 2.1 where referee #2 has requested some additional model information.

More sophisticated approaches will be covered in the 'future direction' paragraph in Section 5 where, in line with other comments above, we shall be including more information about what is required to implement SIT assimilation operationally.

*Figure 2 - I think you should also show (maybe in the supplementary info?) what the pre nudged, and nudged thickness fields are. Could just do this for the mean October-April thickness and also update Figure 1 to show this longer season too. If the mean thickness was way off before it makes sense that assimilating the thickness will improve things.*

We are not entirely sure what the reviewer means by pre-nudged and nudged thickness fields. Because the nudging is so small and applied every time-step pre-nudged and nudged fields will look virtually identical.

The proposed changes to Figure 2 should better show the impact of the nudging as it will include plots of mean thickness for the control and thkDA that can be compared with the CS2 observations.

*Why the different start dates for the forecasts? Pretty confusing.*

This is how the GloSea seasonal prediction system works. GloSea runs every day at the Met Office and produces 2 forecasts of length 210-days. These are used with forecasts from previous days to create a large, lagged ensemble of forecasts. For the hindcasts/reforecasts performed here, an 8-member ensemble is run for fewer distinct start dates. This is done to be consistent with the way that GloSea performs its operational hindcasts – which are initialised from 4 start dates per month (see MacLachlan et al).

*Figure 4 is hard to see. Maybe box plots of the recent years showing the variability in the different estimates in the different years?*

Referee #2 also asked for the layout of Figure 4 to be modified. We are currently trialling options and the revised manuscript will have an improved Figure 4 that will be easier to read. More space on the plot will be devoted to the key time-period of 2011-2015, and we will ensure that the individual ensemble member values are distinct (either by using a box and whisker approach as the referee suggests, or by better spacing out the existing crosses).

*P11 L10 - CMEMS isn't really an observational estimate, right? Based on the assimilation of OSI-SAF...*

We shall change this sentence to refer to CMEMS as a reanalysis product: "To assess the accuracy of the GloSea seasonal predictions, observational, and reanalysis, estimates of Arctic extent, from the CMEMS, HadISST and NSIDC sources (see Section 2.3), are plotted alongside the model predictions (black/grey)."

We note again that, up to issues due to resolution differences, the sea ice extents estimated directly from OSI-SAF and from the CMEMS reanalysis are virtually identical. The CMEMS analysis being on the same grid as the forecast ice concentrations presented in this study makes it the most comparable analogue.

*P11 L14 - not sure what you mean by 'building a picture' here. I see no value in showing that earlier data.*

We agree that the picture requires more building and so we shall modify the text to better paint this picture.

The important features here are that the long control set of re-forecasts exhibits several features: the IIEE is virtually flat (although slightly increasing); the extent is consistently biased low. This shows us that the model – without SIT assimilation– is consistently wrong over this long period, which is more powerful/useful than just looking at a short 5-year section.

*P11 L17 what is close*

We shall update the manuscript to include the differences (i.e., like "2011 is X rather than Y and 2012 is X2 rather than Y2".

*Figure 5 - include numbers on map. Plot the IEE as a time series.*

We shall reprocess Figure 5 so each plot includes a label along the lines of "Extent (model) = X; Extent (obs) = Y; IIEE = Z".

However, we are somewhat confused about the latter part of the referee's comments here because Figure 4b already shows the time series of IIEE.

*Figure 7 and 8 - I don't understand these maps. How exactly is the data shown in Figure 8 calculated? Also is Figure 8 averaged over the entire year, but figure 7 is September? Why are the pressure units different? Perhaps better to show Figure 7a and 8a together, then 8a and 8b*

*The discussion of using ensemble members instead of the ensemble means and how this relates to assessing model bias was confusing and needs more description/clarification.*

Apologies. It looks like "September" was accidentally left off the Figure 8 caption – which we shall fix. We also agree that switching these figures over makes the arguments easier to comprehend. So in the revised manuscript we will have: Figure 7 showing T2M (differences and RMSE), and Figure 8 showing the same for pressure. We shall also extend Fig 8 to include both MSLP and Z500 to prevent confusion between the two.

We shall also update the text in Section 4.2 to better explain how RMSE etc. are calculated.

*Should either enhance the CLIM analysis or drop. i.e. repeat with using a fixed (think FIXED\_IC would be a better acronym) for all years of data available.*

We agree that “FIXED-IC” is a better label. In the revised manuscript we shall change “CLIM-2015” to “FIXED-IC”.

*How do these results compare with Allard?*

Our study is very different from Allard et al. As stated previously, we are initialising a fully-coupled atmosphere-ocean-sea ice-land (AOIL) model with CryoSat-2 (CS2) sea ice thickness and using it to perform an ensemble of seasonal predictions from May through to September. We find that initialising with CryoSat-2 SIT gives us a considerable improvement in Arctic sea ice extent and ice edge location. We also show that memory of winter thickness changes in the initialisation carry through to the end of summer.

Meanwhile Allard et al. (2018) performed an 18-month reanalysis using an ocean-sea ice model forced by atmospheric analyses. They assimilate CS2 thickness during the winter when the data is available. In contrast to our study, and by virtue of the fact they run a reanalysis, they continue assimilating all other variables throughout the year. They show a considerable improvement in their winter thickness analyses when using CS2.

What the two studies have in common is that:

- 1) we both show that assimilating sea ice thickness provides an improvement (us: in coupled seasonal forecasts; them: in their forced reanalysis);
- 2) we both show that memory of initialised winter thickness is still present in the summer (us: after a 5-month free-running coupled forecast; them: after 5 months of assimilating everything except SIT in a forced reanalysis).

Both studies show that sea ice thickness initialisation is beneficial – albeit in very different setups.

*P14 L21 - not sure what you mean by work well. Maybe not gone wrong?*

Technically, the application of thickness increments within the CICE sea ice model while performing a sea ice analysis has worked exactly as expected. The increments have been retained by the model and produce thickness initial conditions, for initialising the seasonal forecasts, that are much closer to the CS2 data. There is also the matter of the exceptional improvement to sea ice location (IIEE) when initialising with SIT.

These points will be better described in the revised manuscript. The fact that the analyses are much closer to the CS2 observations will be illustrated by the proposed changes to Figure 2.

*P14 L1 Why is this from dynamics not thermodynamics?*

The distribution of thickness across the Arctic is caused by a series of dynamic processes. The ice motion, primarily driven by the winds, consists of a re-circulation around the Beaufort



Gyre with a transpolar drift which drives across from Siberia to the north coast of Greenland and north of Svalbard. This causes thick ice to pile up north of Greenland. The fact that we have thicker ice dragged around into the Beaufort Sea and not enough thin ice north of Fram Strait suggests that the ice is too mobile. Both the proposed EAP rheology and form-drag changes would reduce the ice speed and should reduce the bias.

This is also a well-known bias in the sea ice modelling world and is present in most models – including most CICE models, NAOSIM, PIOMAS etc. (see for example Lindsay et al. (2012)).

There is of course a small chance that this is thermodynamically driven, which is why we say this is “most likely” caused by deficiencies in the dynamics.

*Also drop 'so-called ice-ice force'*

This will be dropped in the revised manuscript.

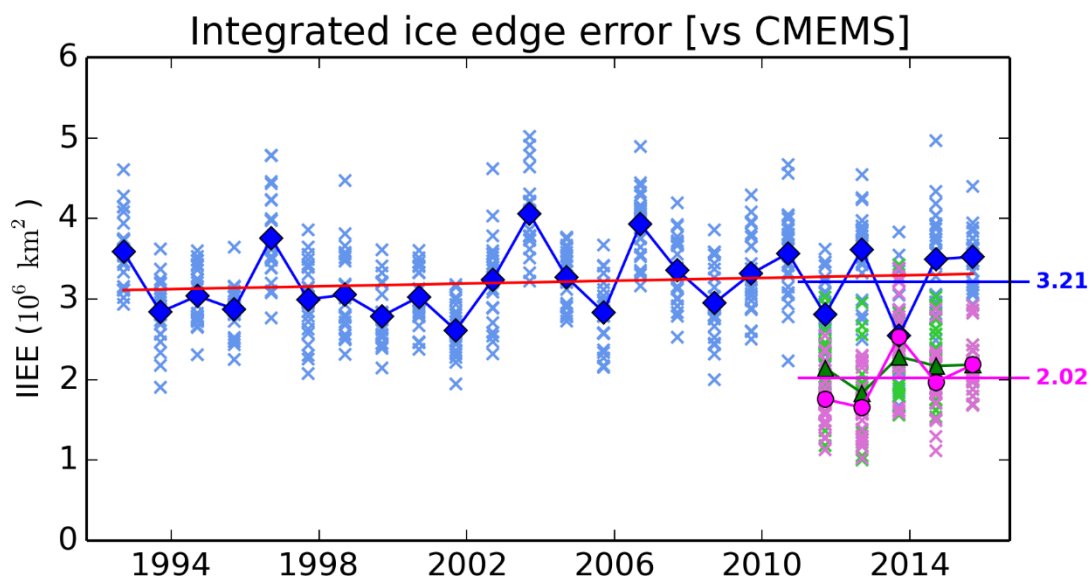

Figure: The original Figure 4b with the IIEE trend line overlain in red.

## References:

Guerreiro, K., Fleury, S., Zakharova, E., Kouraev, A., Rémy, F., and Maisongrande, P.: Comparison of CryoSat-2 and ENVISAT radar freeboard over Arctic sea ice: toward an improved Envisat freeboard retrieval, *The Cryosphere*, 11, 2059-2073, <https://doi.org/10.5194/tc-11-2059-2017>, 2017.

Lindsay, R., Haas, C., Hendricks, S., Hunkeler, P., Kurtz, N., Paden, J., Panzer, B., Sonntag, J., Yungel, J., and Zhang, J.: Seasonal forecasts of Arctic sea ice initialized with

observations of ice thickness, *Geophys. Res. Lett.*, 39, L21502, doi: 10.1029/2012GL053576, 2012.

Stroeve, J. C., Schroder, D., Tsamados, M., and Feltham, D.: Warm winter, thin ice?, *The Cryosphere*, 12, 1791-1809, <https://doi.org/10.5194/tc-12-1791-2018>, 2018.
